# Supplementary material
Source: PubMed Central journal article supplement (PMC3494353)
Supplement: supp_120143_pregnancy-nuyt-1-at.pdf [file supp_120143_pregnancy-nuyt-1-at.pdf]

**Appendix 1 (as supplied by the authors): Logistics Regressions for the Overall Occurrence of Pregnancy Complications at First Live Delivery for Women Born Singleton and Delivering a Singleton Baby.**

| Pregnancy complications  | Variables in the model | OR adjusted* (CI 95%)                                   | P Value for Step† |                     |
|--------------------------|------------------------|---------------------------------------------------------|-------------------|---------------------|
| Gestational diabetes     | Step 1                 |                                                         | <0.001            |                     |
|                          |                        | SGA (vs AGA)                                            |                   | 1.53 (1.26 to 1.87) |
|                          |                        | LGA (vs. AGA)                                           |                   | 1.06 (0.80 to 1.40) |
|                          |                        | Chronic hypertension (vs. without chronic hypertension) |                   | 2.90 (1.62 to 5.19) |
|                          |                        | Kidney disease (vs. without kidney disease)             |                   | 1.92 (0.83 to 4.45) |
|                          |                        | Age ≥ 25 years                                          |                   | 1.50 (1.26 to 1.77) |
| Gestational hypertension | Step 2                 |                                                         | <0.001            |                     |
|                          |                        | <32 weeks                                               |                   | 2.64 (1.85 to 3.77) |
|                          |                        | 32-36 weeks                                             |                   | 1.21 (1.03 to 1.42) |
|                          |                        | At term                                                 |                   | 1.0                 |
| Gestational hypertension | Step 1                 |                                                         | <0.001            |                     |
|                          |                        | SGA (vs AGA)                                            |                   | 1.02 (0.83 to 1.25) |
|                          |                        | LGA (vs. AGA)                                           |                   | 0.84 (0.64 to 1.09) |
|                          |                        | Chronic hypertension (vs. without chronic hypertension) |                   | 3.93 (2.43 to 6.38) |
|                          |                        | Kidney disease (vs. without kidney disease)             |                   | 0.41 (0.10 to 1.67) |
|                          |                        | Type 1 or 2 diabetes (vs. without type 1 or 2 diabetes) |                   | 3.73 (1.81 to 7.67) |
| Gestational hypertension | Step 2                 |                                                         | 0.025             |                     |
|                          |                        | <32 weeks                                               |                   | 1.71 (1.18 to 2.47) |
|                          |                        | 32-36 weeks                                             |                   | 1.07 (0.92 to 1.24) |
|                          |                        | At term                                                 |                   | 1.0                 |
| Preeclampsia/eclampsia   | Step 1                 |                                                         | <0.001            |                     |
|                          |                        | SGA (vs AGA)                                            |                   | 1.35 (1.09 to 1.67) |
|                          |                        | LGA (vs. AGA)                                           |                   | 0.99 (0.73 to 1.32) |
|                          |                        | Chronic hypertension (vs. without chronic hypertension) |                   | 5.75 (3.59 to 9.19) |
|                          |                        | Kidney disease (vs. without kidney disease)             |                   | 3.00 (1.45 to 6.19) |
|                          |                        | Type 1 or 2 diabetes (vs. without type 1 or 2 diabetes) |                   | 3.41 (1.51 to 7.69) |
| Preeclampsia/eclampsia   | Step 2                 |                                                         | 0.008             |                     |
|                          |                        | <32 weeks                                               |                   | 1.80 (1.18 to 2.76) |
|                          |                        | 32-36 weeks                                             |                   | 1.20 (1.01 to 1.42) |
|                          |                        | At term                                                 |                   | 1.0                 |

|                        |        |                                                         |                     |        |
|------------------------|--------|---------------------------------------------------------|---------------------|--------|
|                        | Step 1 |                                                         |                     | <0.001 |
|                        |        | SGA (vs AGA)                                            | 1.25 (1.09 to 1.42) |        |
|                        |        | LGA (vs. AGA)                                           | 0.97 (0.82 to 1.16) |        |
|                        |        | Chronic hypertension (vs. without chronic hypertension) | 5.32 (3.74 to 7.57) |        |
| At least one diagnosis |        | Kidney disease (vs. without kidney disease)             | 1.55 (0.87 to 2.77) |        |
|                        |        | Type 1 or 2 diabetes (vs. without type 1 or 2 diabetes) | 2.83 (1.58 to 5.07) |        |
|                        |        | Age $\geq$ 25 years                                     | 1.23 (1.11 to 1.37) |        |
|                        | Step 2 |                                                         |                     | <0.001 |
|                        |        | <32 weeks                                               | 2.14 (1.68 to 2.73) |        |
|                        |        | 32-36 weeks                                             | 1.14 (1.03 to 1.25) |        |
|                        |        | At term                                                 | 1.0                 |        |

\* ORs are adjusted for other variables in the model (i.e. the OR of variables in step 2 are adjusted for variables in step 1, but not conversely) and for year of birth of the subject.

† When step 1 is significant, this means that the model (i.e. variables included in this step) explain a significant proportion of the variation in pregnancy complications (i.e. explain in a significant part why some people develop the disease and some not). When step 2 is significant, this means that, after removing the part of the variation in pregnancy complications explain by the variables included in the step 1, the variables added in this step, i.e. groups of gestational age, explain a significant proportion of the variation in pregnancy complications (i.e. explain in a significant part, that is not explain by the variables included in step 1, why some people develop the disease and some not).

‡ SGA: small weight for gestational age; AGA: appropriate weight for gestational age.

§ LGA: large weight for gestational age.
