# Supplementary material
Source: PubMed Central journal article supplement (PMC3494353)
Supplement: supp_120143_pregnancy-nuyt-2-at.pdf [file supp_120143_pregnancy-nuyt-2-at.pdf]

**Appendix 2 (as supplied by the authors): Incidence and Odds Ratio of the Overall Occurrence of Pregnancy Complications at First Live Delivery for Women Born Singleton and Delivering a Singleton Baby.**

|                          |             | No. (%)     | OR adjusted* (CI 95%) |
|--------------------------|-------------|-------------|-----------------------|
| Gestational Diabetes     | <32 weeks   | 36 (7.78)   | 2.64 (1.85 to 3.77)   |
|                          | 32-36 weeks | 224 (3.80)  | 1.21 (1.03 to 1.42)   |
|                          | At term     | 466 (3.17)  | 1.0                   |
| Gestational Hypertension | <32 weeks   | 32 (6.91)   | 1.71 (1.18 to 2.47)   |
|                          | 32-36 weeks | 263 (4.46)  | 1.07 (0.92 to 1.24)   |
|                          | At term     | 611 (4.15)  | 1.0                   |
| Preeclampsia/eclampsia   | <32 weeks   | 24 (5.18)   | 1.80 (1.18 to 2.76)   |
|                          | 32-36 weeks | 208 (3.53)  | 1.20 (1.01 to 1.42)   |
|                          | At term     | 431 (2.93)  | 1.0                   |
| At least one diagnosis   | <32 weeks   | 85 (18.36)  | 2.14 (1.68 to 2.73)   |
|                          | 32-36 weeks | 635 (10.77) | 1.14 (1.03 to 1.25)   |
|                          | At term     | 1407 (9.56) | 1.0                   |

\* ORs are adjusted for being born small or large weight for gestational age, for year of birth of the subject, for chronic hypertension, type I and II diabetes (except for gestational diabetes), kidney disease and women age  $\geq$  25 years.
